# Supplementary material
Source: publisher site journal article supplement (https://www.dovepress.com/article/134340)

## Supplementary material 5:

## Response rate (primary outcome)

### Node-splitting inconsistency

#### model

- $p < 0.05$  was set as significant inconsistency

ARI: aripiprazole, BLO: blonanserin, CLO: clozapine, Cloca: clocapramine, HAL: haloperidol, MOS: mosapramine, OLA: olanzapine, PAL: paliperidone, PER: perospirone, PBO: placebo, QUE: quetiapine, RIS: risperidone

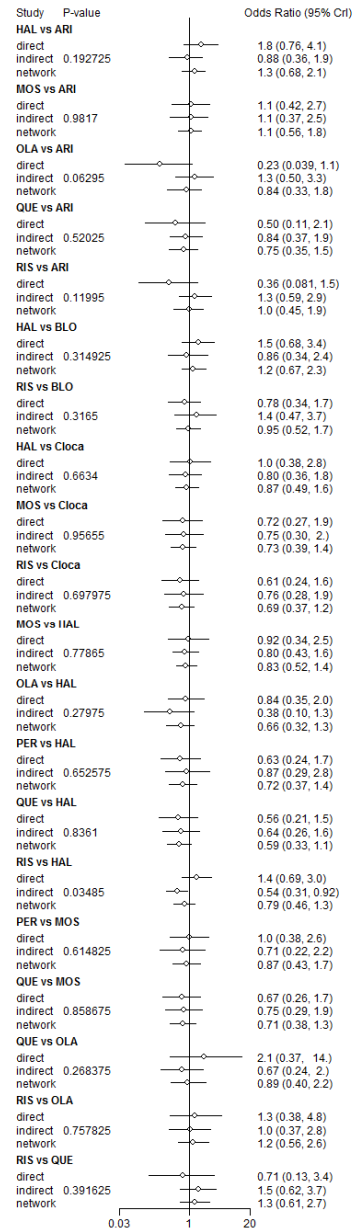

## PANSS total scores

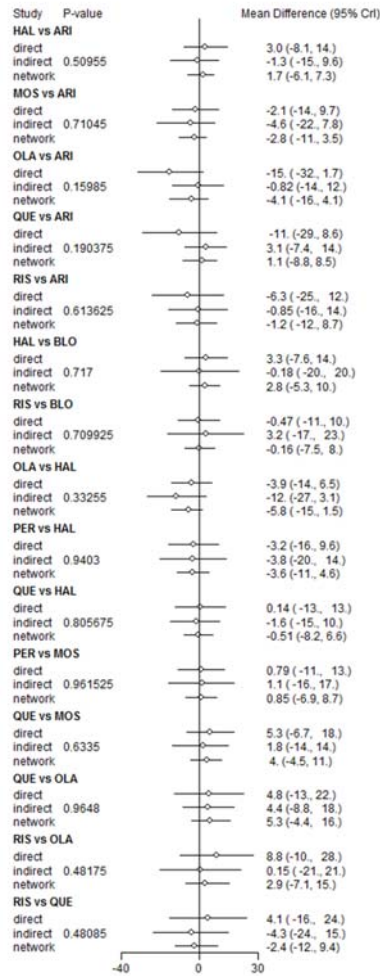

## PANSS positive subscale scores

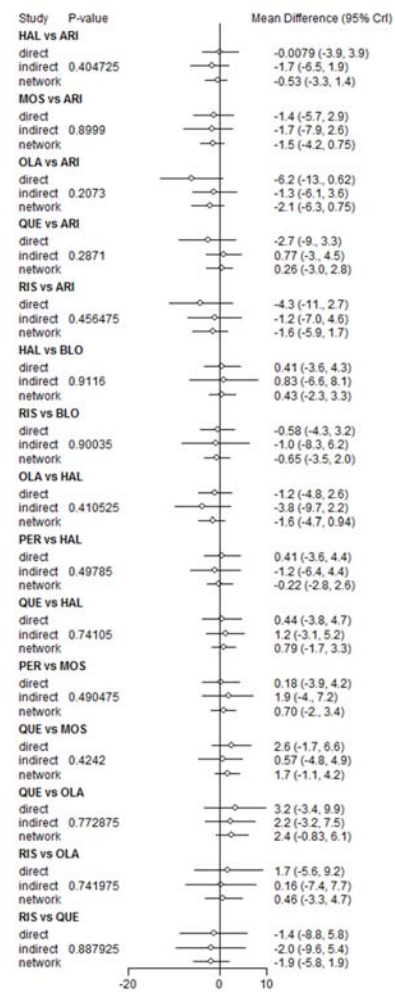

## PANSS negative subscale scores

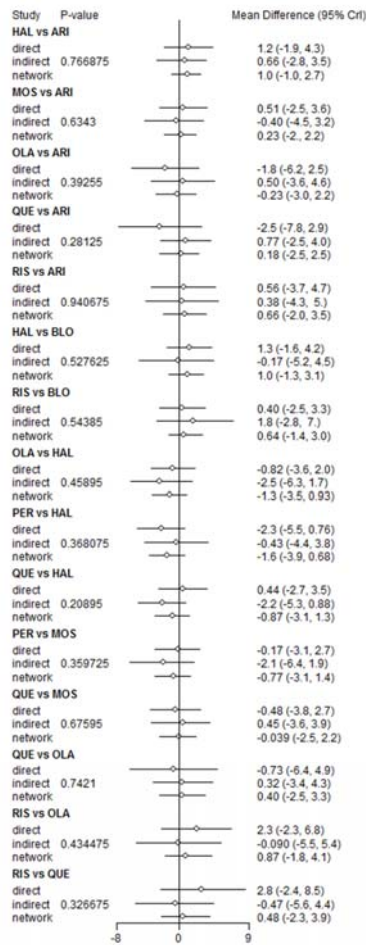

## PANSS general subscale scores

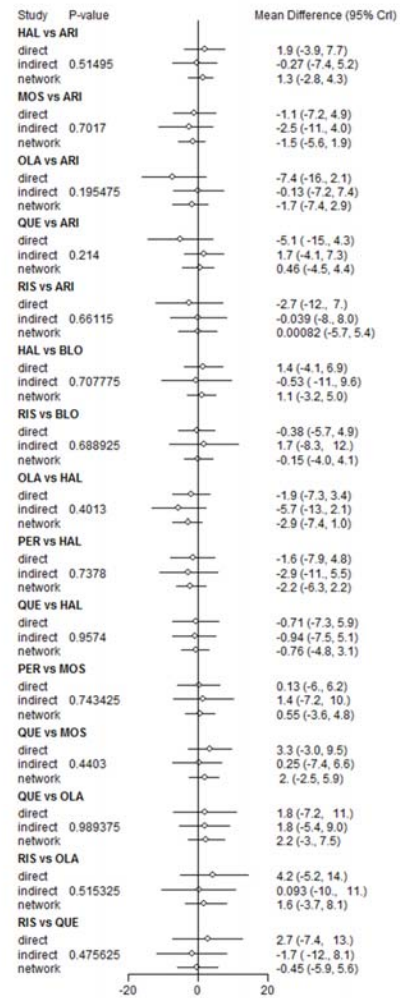

## All-cause discontinuation (primary outcome)

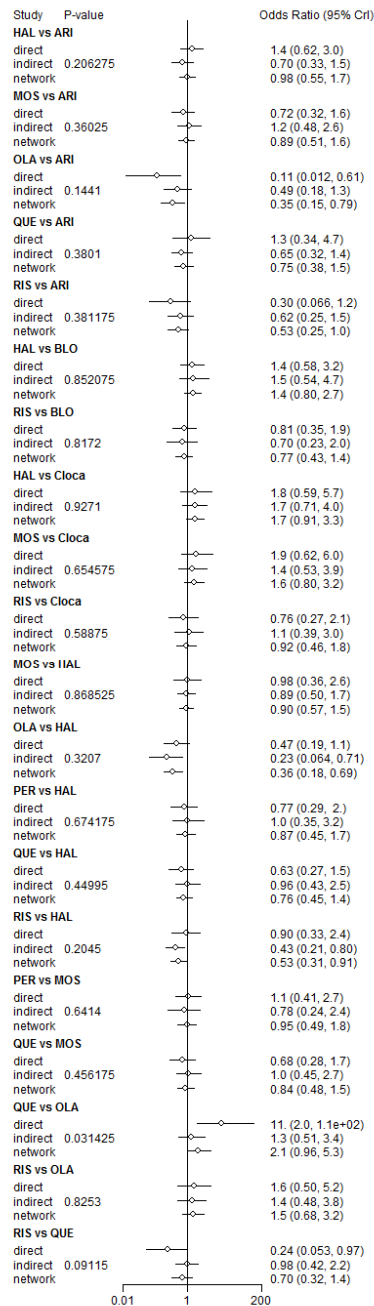

## Discontinuation due to adverse events

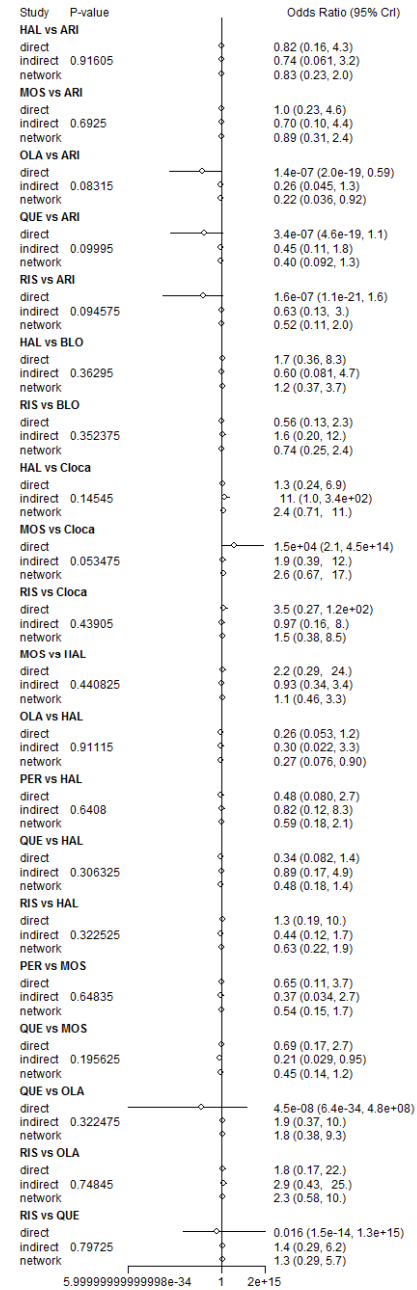

## At least one adverse event

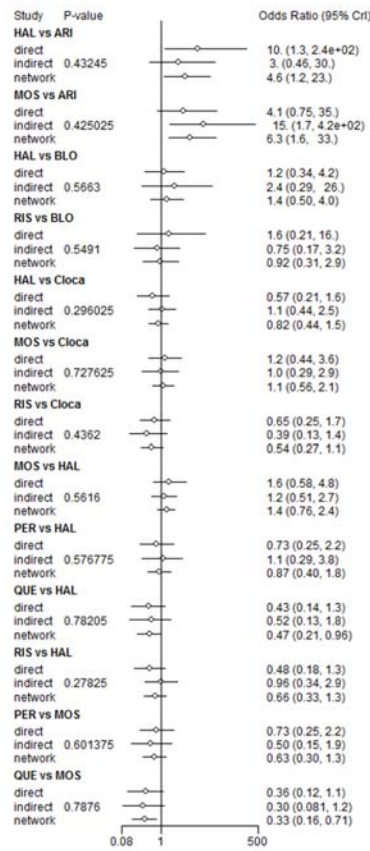

## Agitation/anxiety/use of anxiolytics

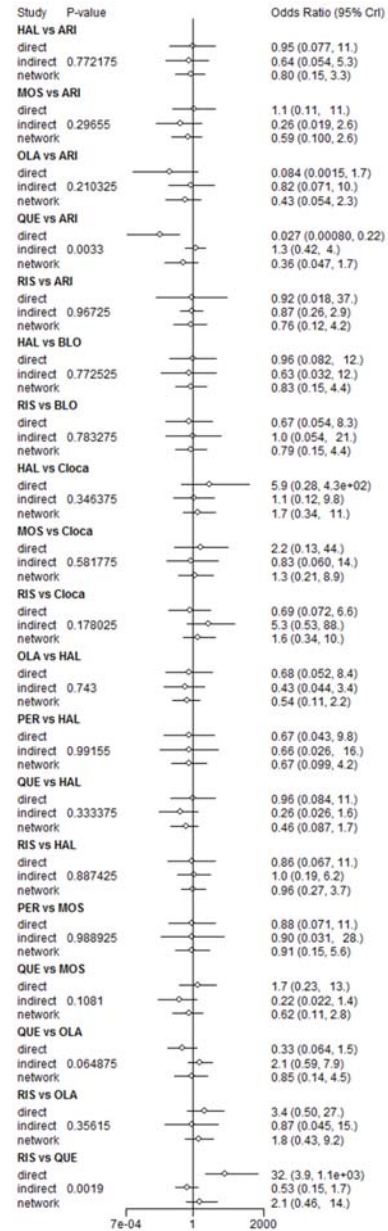

Insomnia/use of hypnotics

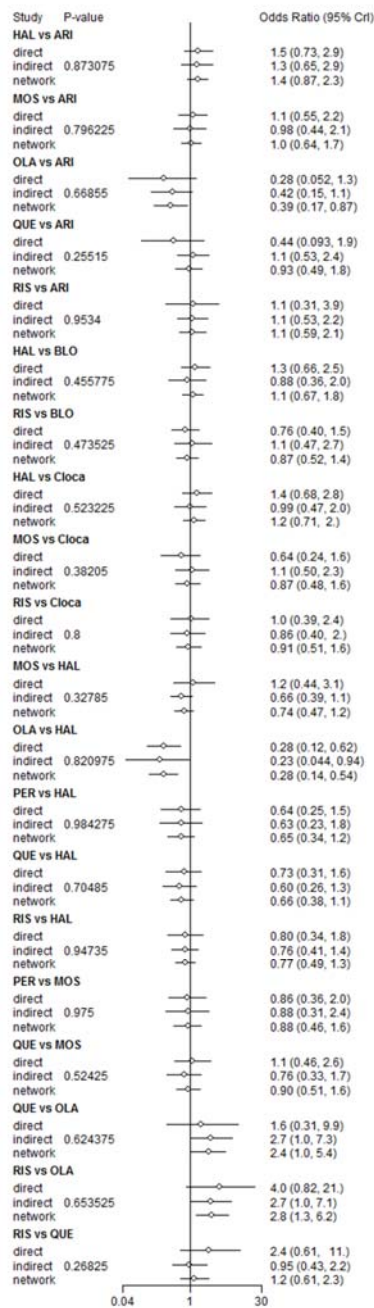

Drowsiness/sedation/somnolence

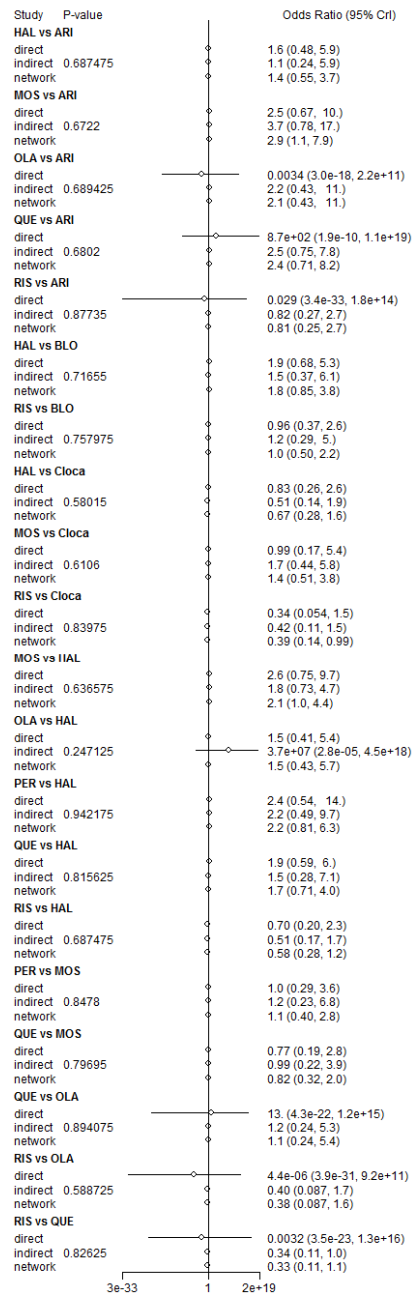



## Extrapyramidal symptoms/use of anticholinergic drugs/tremor

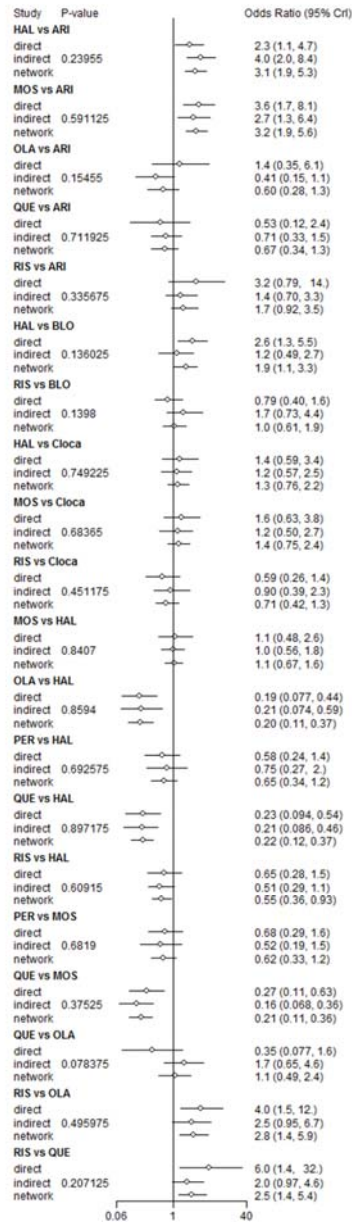

## Akathisia

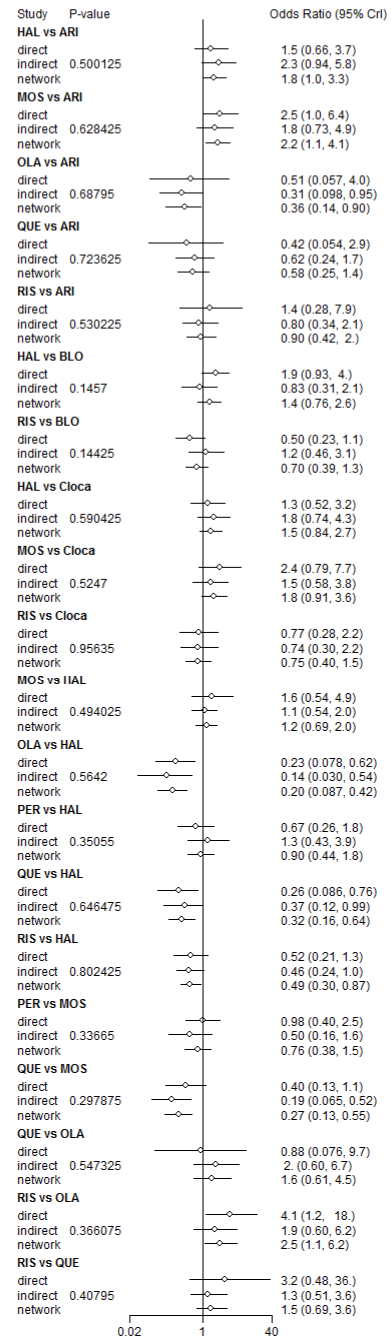

Increased salivation

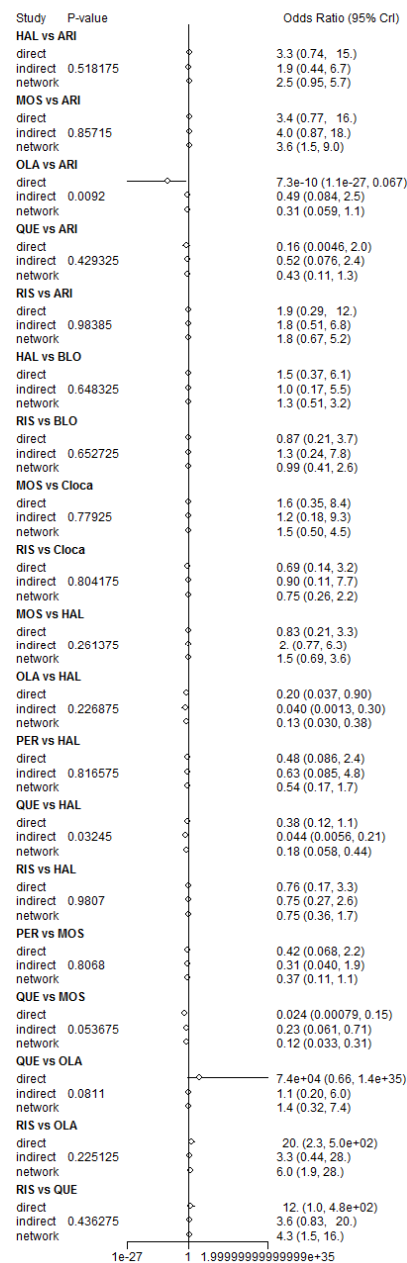

Potentially prolactin-related adverse events

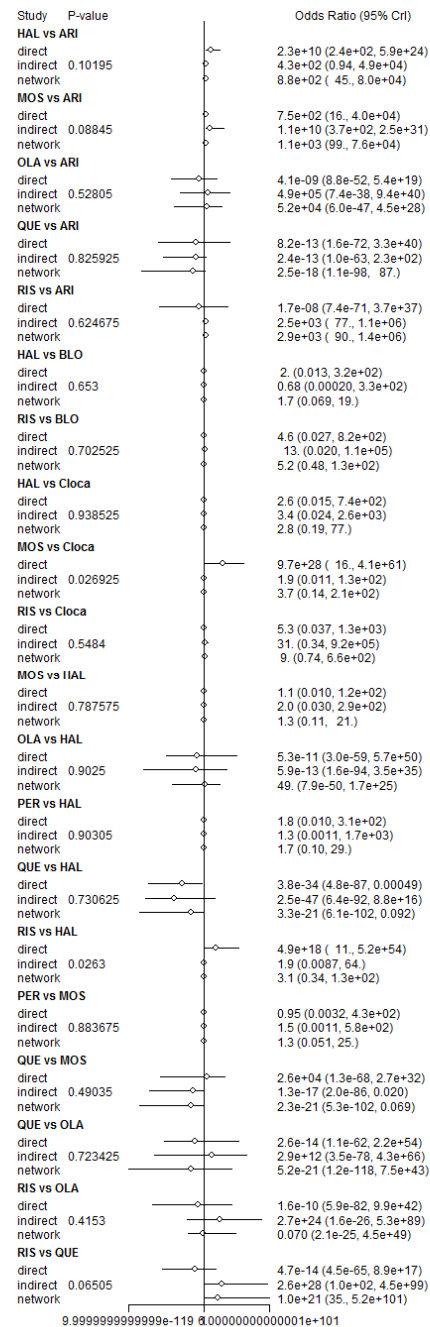



Weight change

Total cholesterol

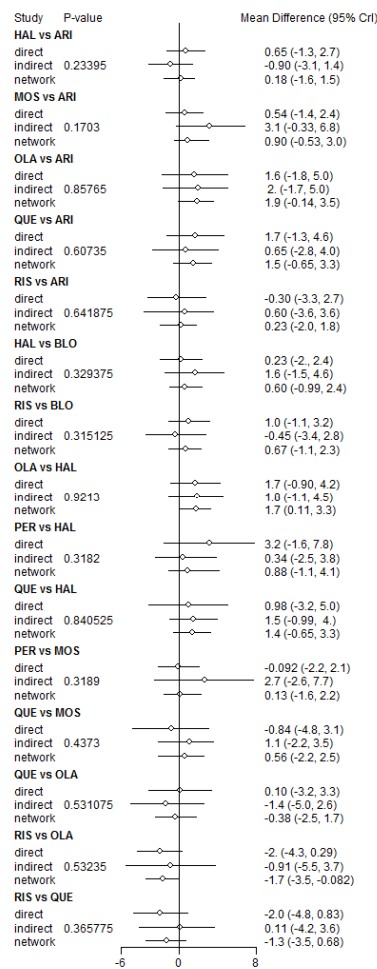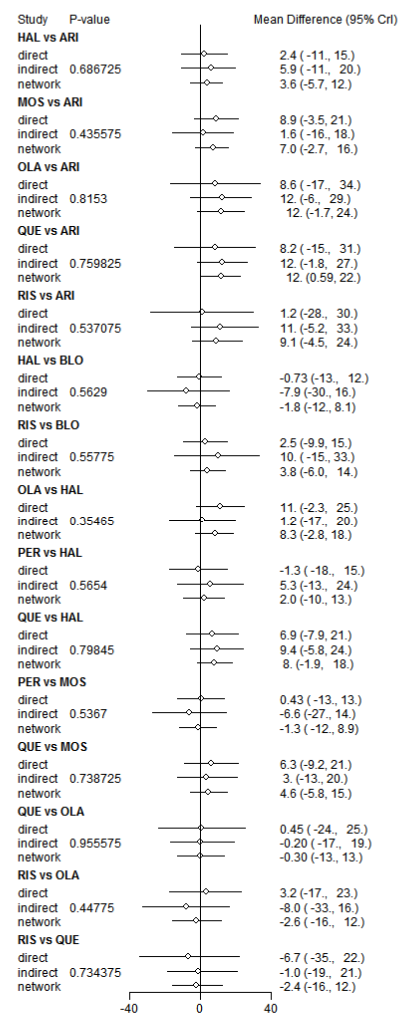

Triglyceride

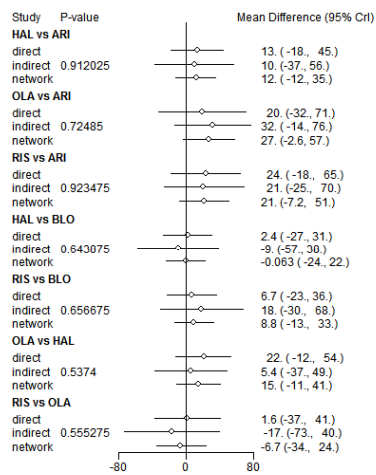

Supplement: Supplementary file 4 [file get_supplementary_file.php]
