# Supplementary material
Source: publisher site journal article supplement (https://www.dovepress.com/article/134340)

## Supplementary material 6:

### Rank probabilities

- These probabilities summed to 1 for each treatment and each rank. X% denotes that the mode achieved x% effectiveness; thus, larger percentages denote more effective interventions. However, these percentages indicate possibilities only and are not deterministic.<sup>1</sup>

1. Salanti G, Ades AE, Ioannidis JP. Graphical methods and numerical summaries for presenting results from multiple-treatment meta-analysis: an overview and tutorial. *J Clin Epidemiol* Feb 2011;64(2):163-171.

ARI: aripiprazole, BLO: blonanserin, CLO: clozapine, Cloca: clocapramine, HAL: haloperidol, MOS: mosapramine, OLA: olanzapine, PAL: paliperidone, PER: perospirone, PBO: placebo, QUE: quetiapine, RIS: risperidone

### Response rate (primary outcome)

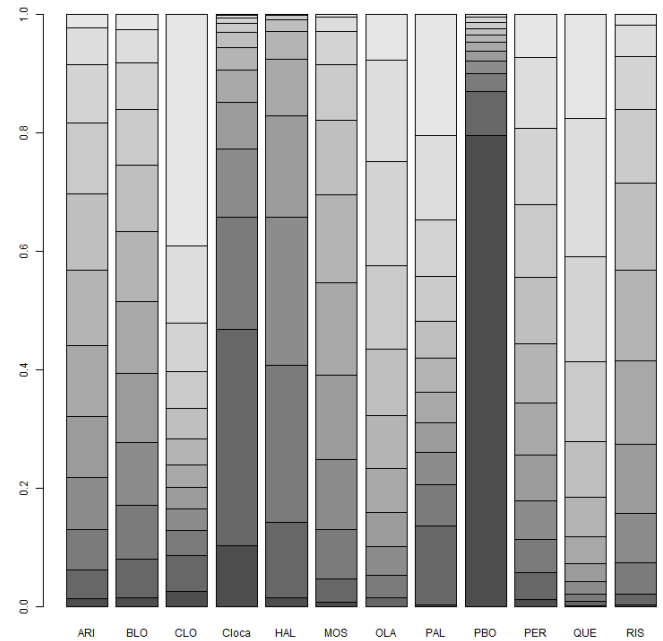

### PANSS total scores

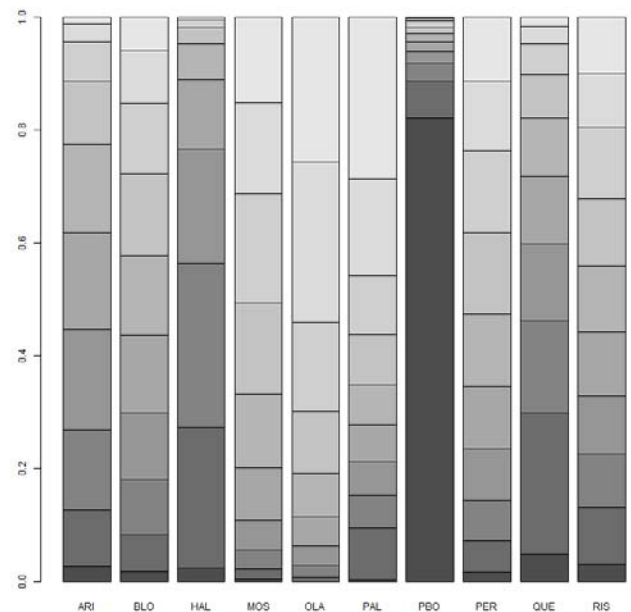

PANSS positive subscale scores

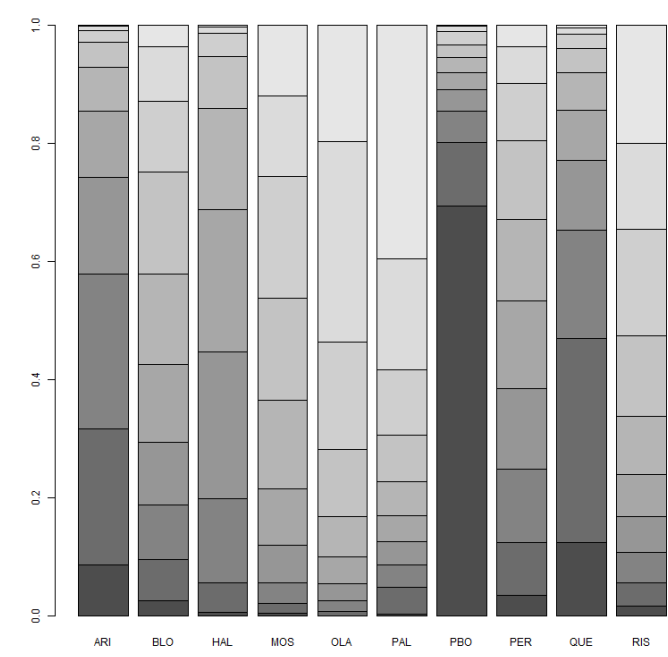

PANSS general subscale scores

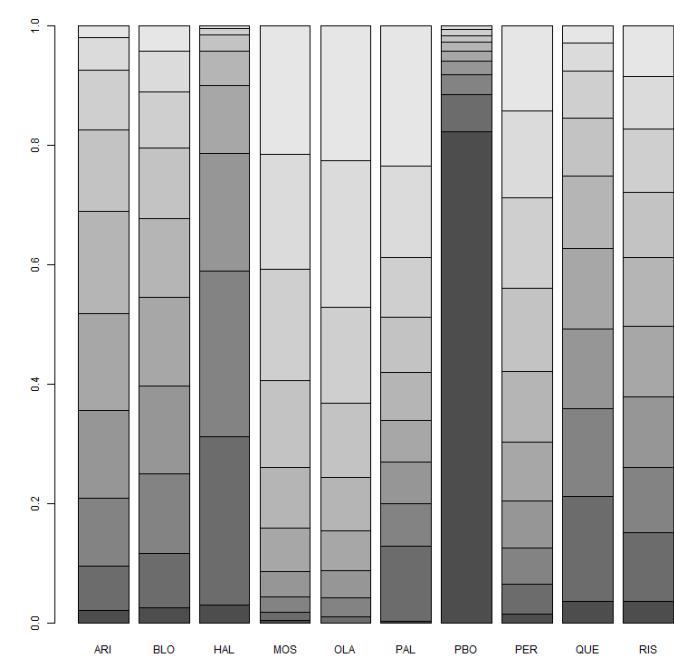

PANSS negative subscale scores

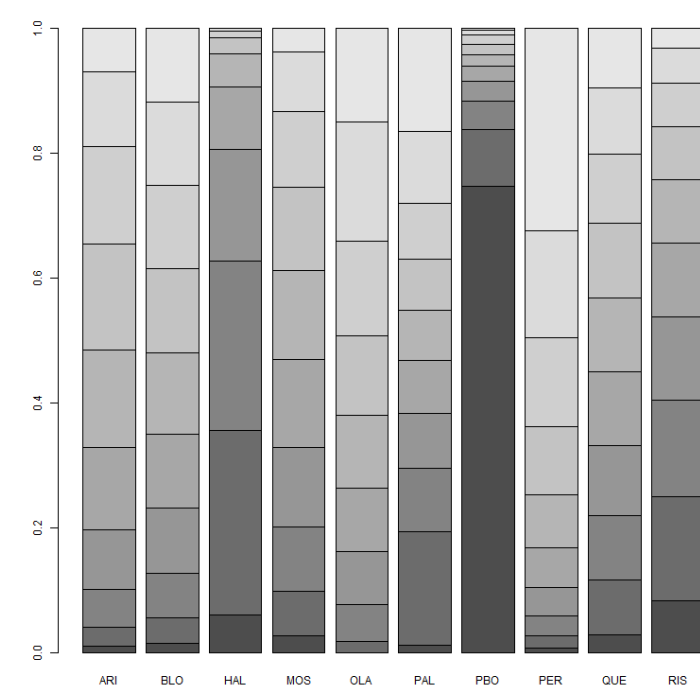

All-cause discontinuation (primary outcome)

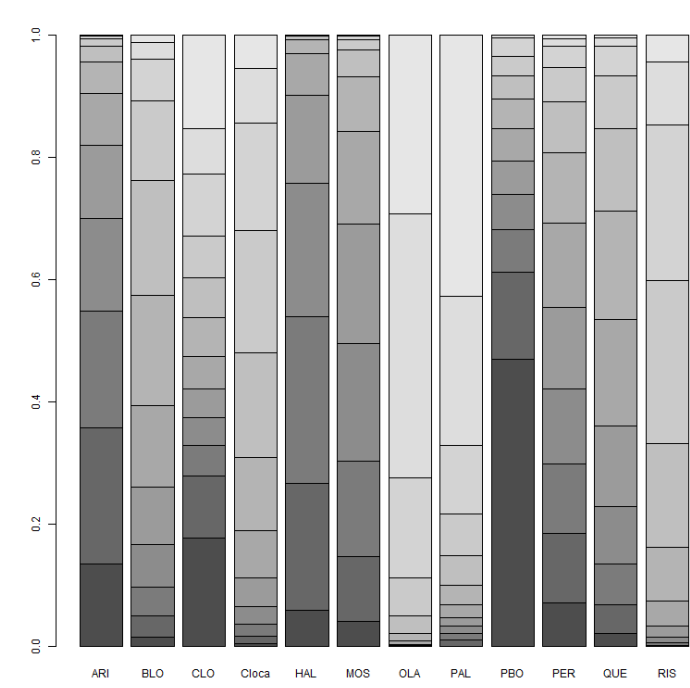

Discontinuation due to adverse events

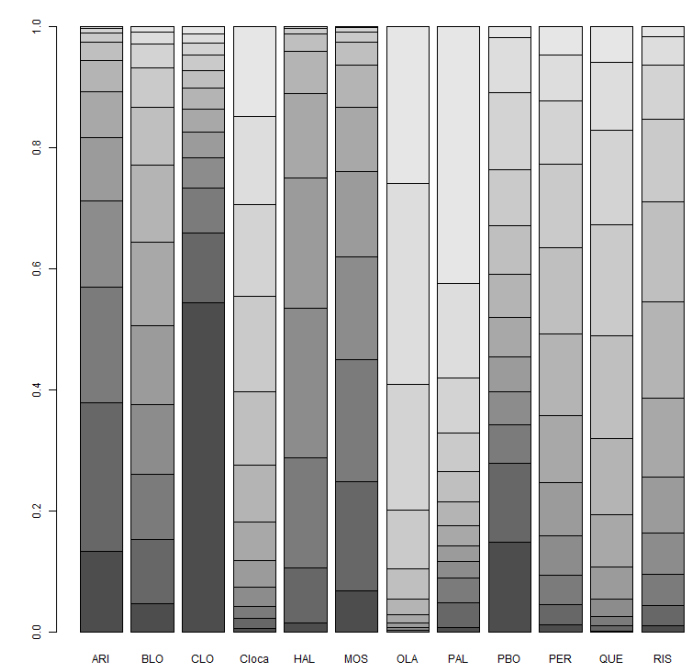

Agitation/anxiety/use of anxiolytics

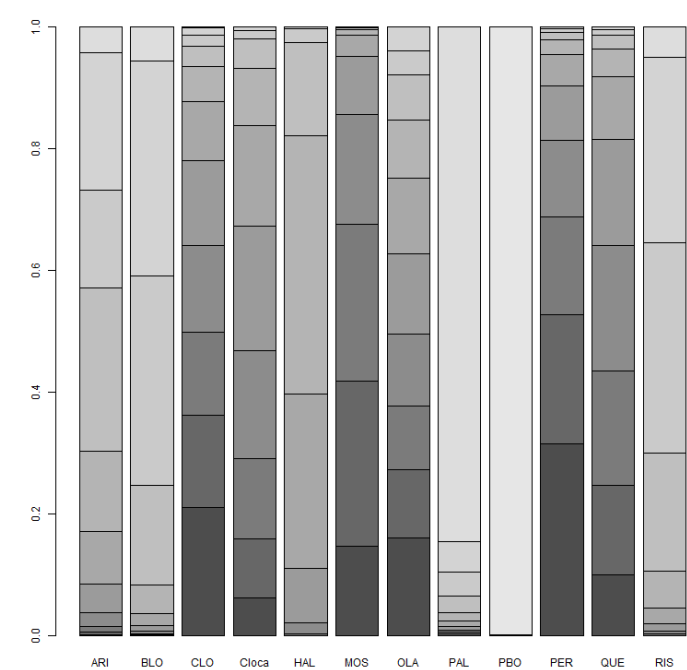

At least one adverse event

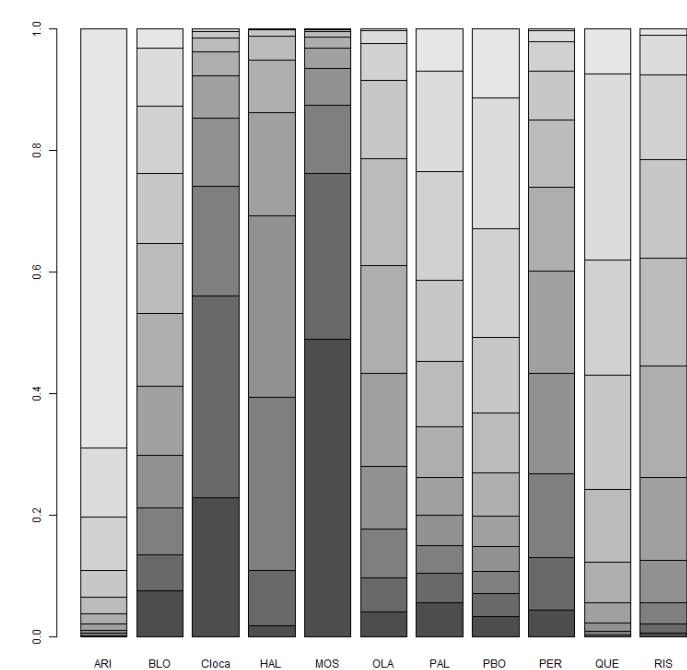

Insomnia/use of hypnotics

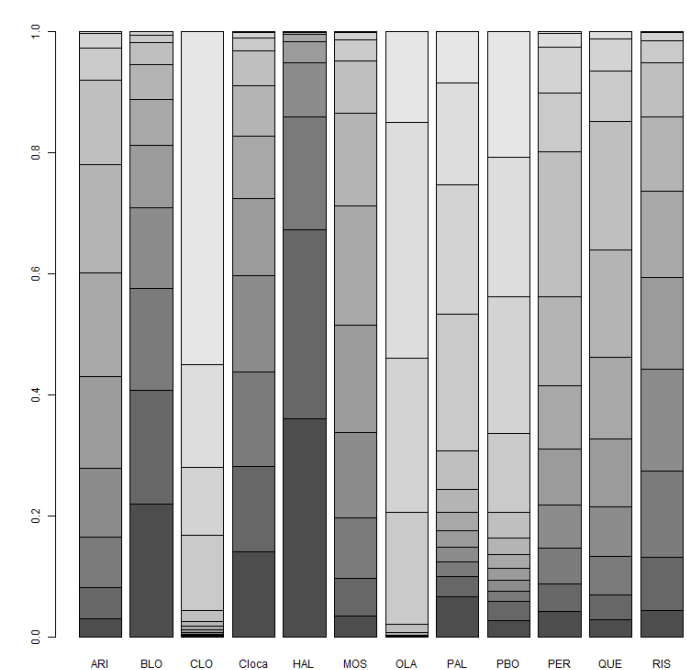

Drowsiness/sedation/somnolence

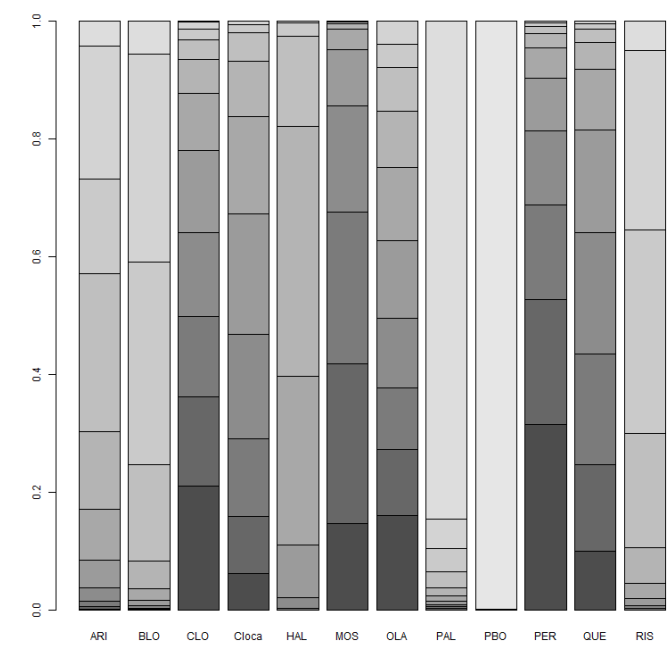

Akathisia

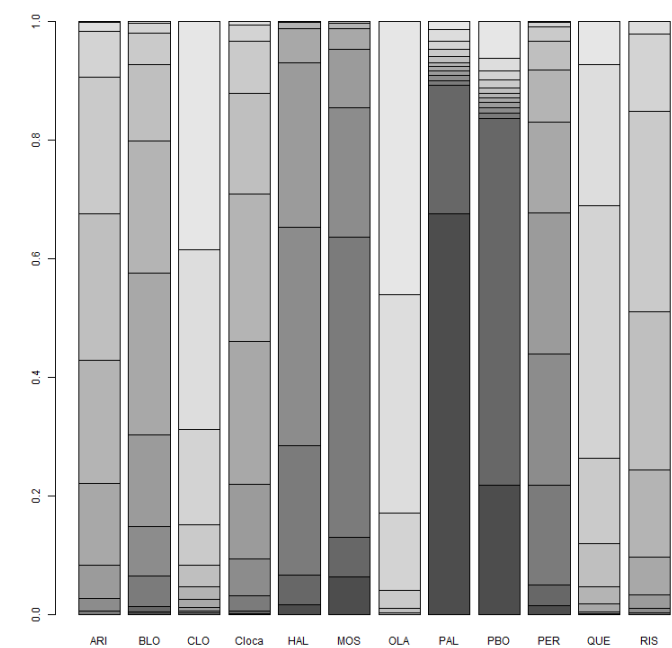

Extrapyramidal symptoms/use of anticholinergic drugs/tremor

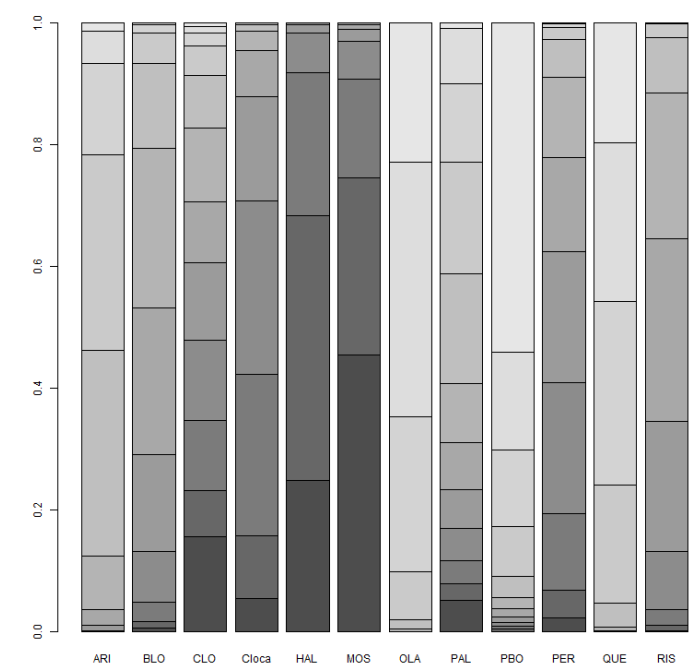

Increased salivation

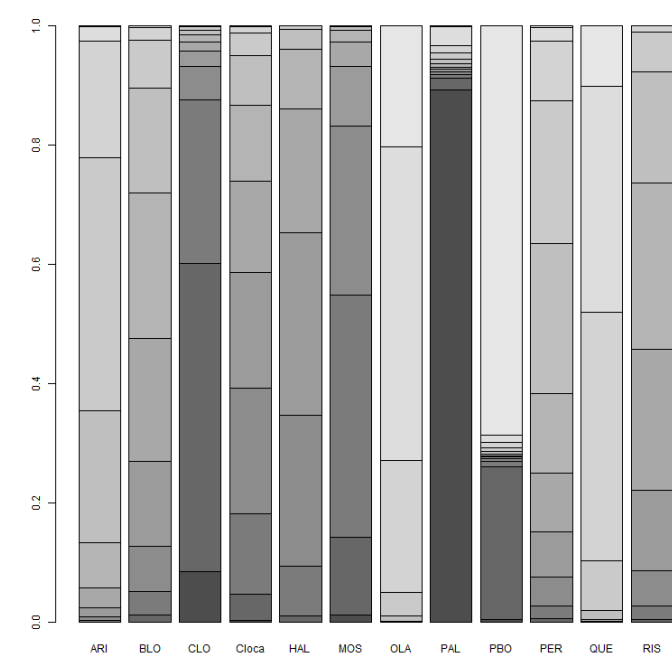

Potentially prolactin-related adverse events

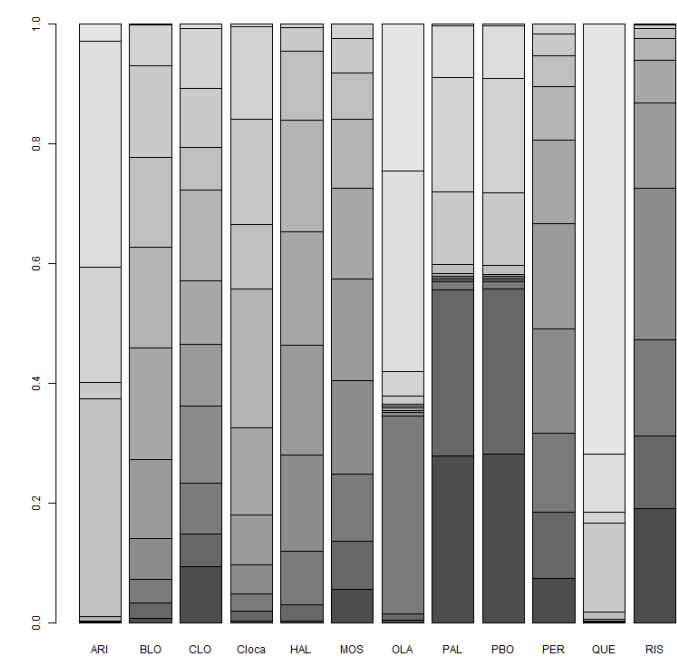

Total cholesterol

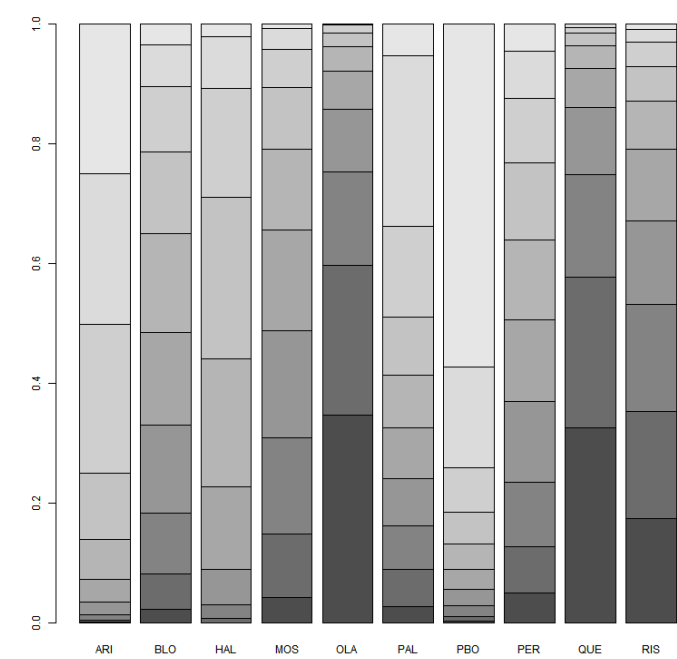

Weight change

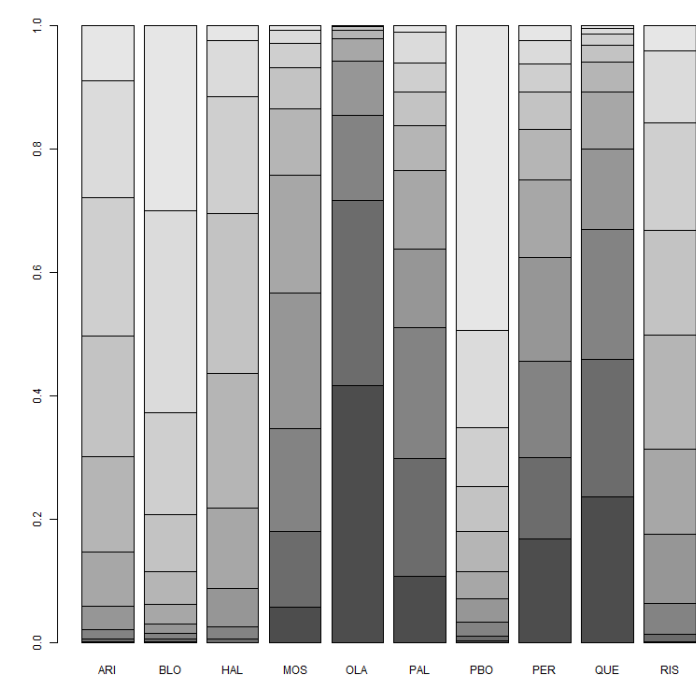

Triglyceride

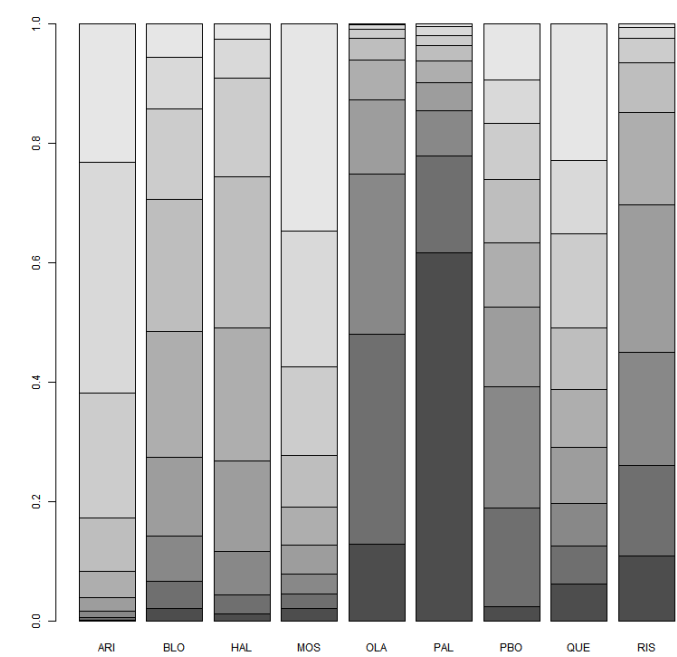

Supplement: Supplementary file 5 [file get_supplementary_file.php]
