# Supplementary material
Source: publisher site journal article supplement (https://www.dovepress.com/article/134340)
Supplement: Supplementary file 1 [file get_supplementary_file.php]

## **Supplementary material 1:**

### **The Definitions of response**

|                |                                          |
|----------------|------------------------------------------|
| Ishigooka 2006 | FGIR remarkable and moderate improvement |
| 031-95-003     | FGIR remarkable and moderate improvement |
| Hatta 2009     | PANSS decreased score more than 20%      |
| Murasaki 2007  | FGIR remarkable and moderate improvement |
| Miura 2008     | FGIR remarkable and moderate improvement |
| Yagi 1974      | FGIR remarkable and moderate improvement |
| Kurihara 1983  | FGIR remarkable and moderate improvement |
| Kato 1989      | FGIR remarkable and moderate improvement |
| Kudo 1994      | FGIR remarkable and moderate improvement |
| Kudo 1990      | FGIR remarkable and moderate improvement |
| Ishigooka 2001 | FGIR remarkable and moderate improvement |
| Murasaki 1997  | FGIR remarkable and moderate improvement |
| Murasaki 2001  | FGIR remarkable and moderate improvement |
| Murasaki 1993  | FGIR remarkable and moderate improvement |
| Kudo 1997      | FGIR remarkable and moderate improvement |
| Kudo 2000      | FGIR remarkable and moderate improvement |
| Hirayasu 2010  | PANSS decreased score more than 30%      |
| Hatta 2013     | PANSS decreased score more than 20%      |

FGIR: Final Global Improvement Rating, the Global comprehensive judgement

PANSS: Positive and Negative Syndrome Scale
