# Supplementary material
Source: publisher site journal article supplement (https://www.dovepress.com/article/134340)

## Supplementary material 2:

### Preferred Reporting Items for Systematic reviews and Meta-Analysis (PRISMA) Flow

#### Diagram

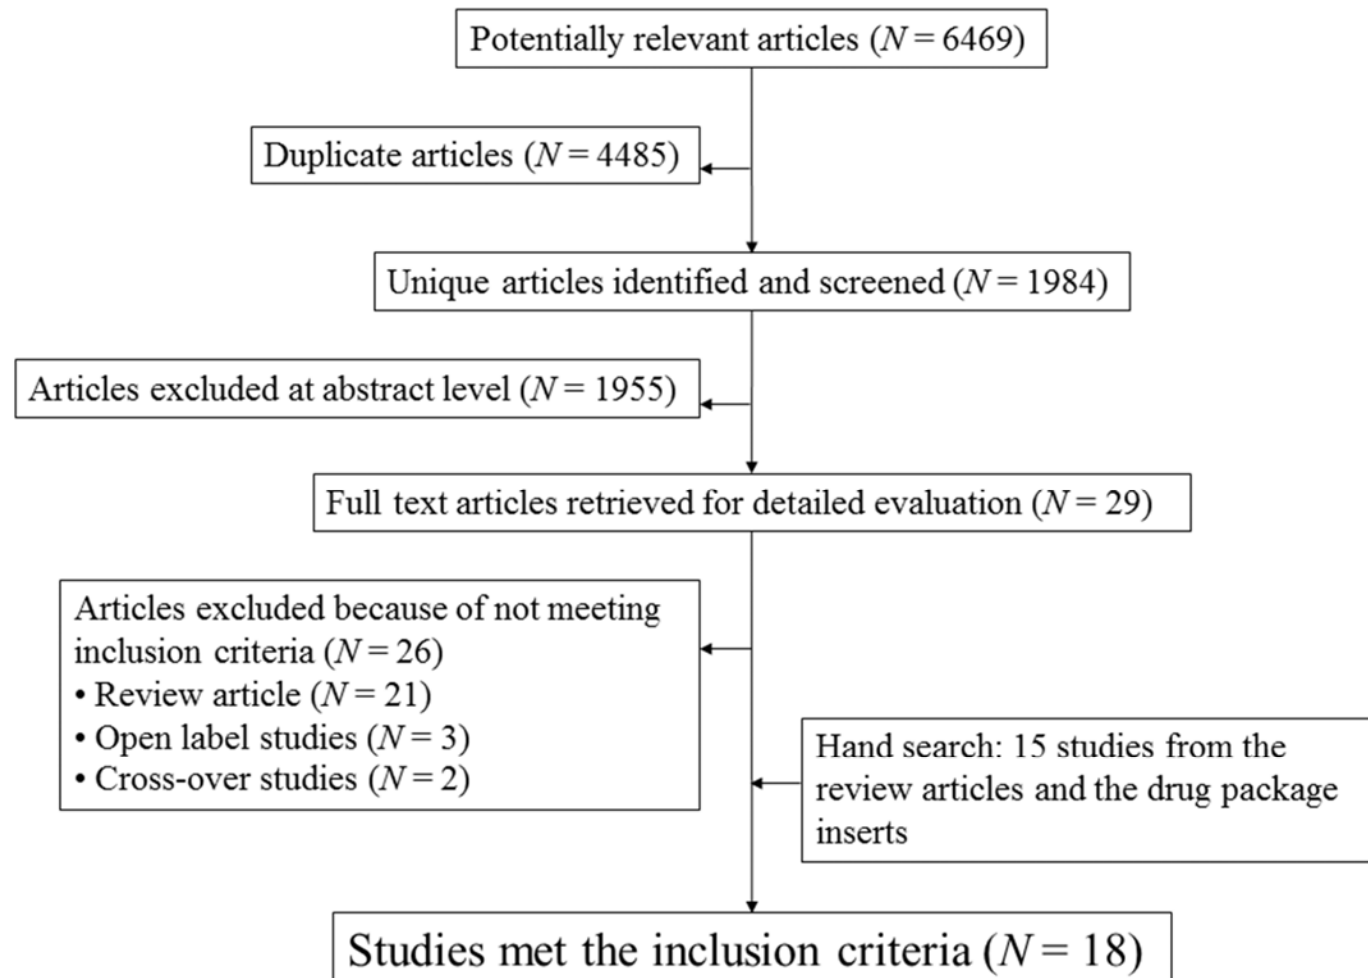

Supplement: Supplementary file 2 [file get_supplementary_file.php]
