# Supplementary material
Source: publisher site journal article supplement (https://www.dovepress.com/article/134340)
Supplement: Supplementary file 3 [file get_supplementary_file.php]

## Supplementary material 4:

### The goodness of fit of the model

- A lower deviance information criterion (DIC) value indicates a better model fit (\*).

#### PANSS total scores

Consistency model\*

| Dbar     | pD       | DIC      |
|----------|----------|----------|
| 23.87826 | 21.57924 | 45.45750 |

Unrelated mean effects model

| Dbar     | pD       | DIC      |
|----------|----------|----------|
| 24.97662 | 24.97640 | 49.95302 |

Unrelated study effects model

| Dbar     | pD       | DIC      |
|----------|----------|----------|
| 24.98767 | 24.98761 | 49.97529 |

#### Response rate (primary outcome)

Consistency model\*

| Dbar     | pD       | DIC      |
|----------|----------|----------|
| 38.58594 | 32.72124 | 71.30718 |

Unrelated mean effects model

| Dbar     | pD       | DIC      |
|----------|----------|----------|
| 39.47082 | 39.47025 | 78.94107 |

Unrelated study effects model

| Dbar     | pD       | DIC      |
|----------|----------|----------|
| 39.47332 | 39.47312 | 78.94644 |

#### PANSS positive subscale scores

Consistency model\*

| Dbar     | pD       | DIC      |
|----------|----------|----------|
| 24.02301 | 21.84960 | 45.87261 |

Unrelated mean effects model

| Dbar     | pD       | DIC      |
|----------|----------|----------|
| 24.99856 | 24.99841 | 49.99697 |

Unrelated study effects model

| Dbar     | pD       | DIC      |
|----------|----------|----------|
| 24.99680 | 24.99672 | 49.99352 |

### PANSS negative subscale scores

Consistency model\*

| Dbar     | pD       | DIC      |
|----------|----------|----------|
| 24.45250 | 21.94164 | 46.39414 |

Unrelated mean effects model

| Dbar     | pD       | DIC      |
|----------|----------|----------|
| 24.97460 | 24.97402 | 49.94863 |

Unrelated study effects model

| Dbar     | pD       | DIC      |
|----------|----------|----------|
| 24.99500 | 24.99481 | 49.98981 |

### PANSS general subscale scores

Consistency model\*

| Dbar    | pD      | DIC     |
|---------|---------|---------|
| 23.8072 | 21.5686 | 45.3758 |

Unrelated mean effects model

| Dbar     | pD       | DIC      |
|----------|----------|----------|
| 24.99452 | 24.99432 | 49.98884 |

Unrelated study effects model

| Dbar     | pD       | DIC      |
|----------|----------|----------|
| 24.98030 | 24.98008 | 49.96038 |

### All-cause discontinuation (primary outcome)

Consistency model\*

| Dbar     | pD       | DIC      |
|----------|----------|----------|
| 38.08204 | 31.69426 | 69.77629 |

Unrelated mean effects model

| Dbar     | pD       | DIC      |
|----------|----------|----------|
| 39.60495 | 39.60471 | 79.20966 |

Unrelated study effects model

| Dbar     | pD       | DIC      |
|----------|----------|----------|
| 39.55125 | 39.55113 | 79.10238 |

### Discontinuation due to adverse events

Consistency model\*

| Dbar     | pD       | DIC      |
|----------|----------|----------|
| 37.56699 | 32.09073 | 69.65771 |

Unrelated mean effects model

| Dbar     | pD       | DIC      |
|----------|----------|----------|
| 36.73431 | 36.42775 | 73.16206 |

Unrelated study effects model

| Dbar     | pD       | DIC      |
|----------|----------|----------|
| 36.77713 | 36.46503 | 73.24216 |

### At least one adverse event

Consistency model\*

| Dbar     | pD       | DIC      |
|----------|----------|----------|
| 29.42905 | 27.16573 | 56.59477 |

Unrelated mean effects model

| Dbar     | pD       | DIC      |
|----------|----------|----------|
| 31.62242 | 31.62216 | 63.24458 |

Unrelated study effects model

| Dbar     | pD       | DIC      |
|----------|----------|----------|
| 31.63412 | 31.63403 | 63.26816 |

### Agitation/anxiety/use of anxiolytics

Consistency model\*

| Dbar     | pD       | DIC      |
|----------|----------|----------|
| 38.68777 | 34.42284 | 73.11061 |

Unrelated mean effects model

| Dbar     | pD       | DIC      |
|----------|----------|----------|
| 38.06389 | 38.06323 | 76.12712 |

Unrelated study effects model

| Dbar     | pD       | DIC      |
|----------|----------|----------|
| 38.08334 | 38.08314 | 76.16648 |

### Insomnia/use of hypnotics

Consistency model\*

| Dbar     | pD       | DIC      |
|----------|----------|----------|
| 32.83990 | 29.82844 | 62.66834 |

Unrelated mean effects model

| Dbar     | pD       | DIC      |
|----------|----------|----------|
| 37.46531 | 37.46495 | 74.93025 |

Unrelated study effects model

| Dbar     | pD       | DIC      |
|----------|----------|----------|
| 37.49821 | 37.49813 | 74.99634 |

### Drowsiness/sedation/somnolence

Consistency model\*

| Dbar     | pD       | DIC      |
|----------|----------|----------|
| 28.38213 | 27.62724 | 56.00937 |

Unrelated mean effects model

| Dbar     | pD       | DIC      |
|----------|----------|----------|
| 32.75136 | 32.68526 | 65.43661 |

Unrelated study effects model

| Dbar     | pD       | DIC      |
|----------|----------|----------|
| 32.76122 | 32.69502 | 65.45624 |

### **EPS/use of anticholinergic drugs/tremor**

Consistency model\*

| Dbar     | pD       | DIC      |
|----------|----------|----------|
| 38.95778 | 31.89686 | 70.85464 |

Unrelated mean effects model

| Dbar     | pD       | DIC      |
|----------|----------|----------|
| 39.42492 | 39.42458 | 78.84950 |

Unrelated study effects model

| Dbar     | pD       | DIC      |
|----------|----------|----------|
| 39.40012 | 39.39990 | 78.80002 |

### **Akathisia**

Consistency model\*

| Dbar     | pD       | DIC      |
|----------|----------|----------|
| 35.58656 | 30.89702 | 66.48358 |

Unrelated mean effects model

| Dbar     | pD       | DIC      |
|----------|----------|----------|
| 39.04544 | 38.91012 | 77.95556 |

Unrelated study effects model

| Dbar     | pD       | DIC      |
|----------|----------|----------|
| 39.04247 | 38.92016 | 77.96263 |

### **Increased salivation**

Consistency model\*

| Dbar     | pD       | DIC      |
|----------|----------|----------|
| 35.63300 | 29.08743 | 64.72043 |

Unrelated mean effects model

| Dbar     | pD       | DIC      |
|----------|----------|----------|
| 35.31639 | 35.21822 | 70.53460 |

Unrelated study effects model

| Dbar     | pD       | DIC      |
|----------|----------|----------|
| 35.25581 | 35.16406 | 70.41987 |

### **Potentially prolactin-related adverse events**

Consistency model\*

| Dbar     | pD       | DIC      |
|----------|----------|----------|
| 26.78483 | 24.52355 | 51.30838 |

Unrelated mean effects model

| Dbar     | pD       | DIC      |
|----------|----------|----------|
| 26.28264 | 26.08699 | 52.36962 |

Unrelated study effects model

| Dbar     | pD       | DIC      |
|----------|----------|----------|
| 26.26935 | 26.07032 | 52.33967 |

## Weight change

Consistency model\*

| Dbar     | pD       | DIC      |
|----------|----------|----------|
| 25.66238 | 23.59507 | 49.25744 |

Unrelated mean effects model

| Dbar     | pD       | DIC      |
|----------|----------|----------|
| 26.98864 | 26.98477 | 53.97342 |

Unrelated study effects model

| Dbar     | pD       | DIC      |
|----------|----------|----------|
| 26.98274 | 26.97853 | 53.96127 |

## Total cholesterol

Consistency model\*

| Dbar     | pD       | DIC      |
|----------|----------|----------|
| 24.41711 | 22.46309 | 46.88020 |

Unrelated mean effects model

| Dbar     | pD       | DIC      |
|----------|----------|----------|
| 26.95649 | 26.95582 | 53.91232 |

Unrelated study effects model

| Dbar     | pD       | DIC      |
|----------|----------|----------|
| 26.97774 | 26.97719 | 53.95493 |

## Triglyceride

Consistency model\*

| Dbar     | pD       | DIC      |
|----------|----------|----------|
| 17.09863 | 16.78400 | 33.88262 |

Unrelated mean effects model

| Dbar     | pD       | DIC      |
|----------|----------|----------|
| 18.97056 | 18.97042 | 37.94098 |

Unrelated study effects model

| Dbar     | pD       | DIC      |
|----------|----------|----------|
| 18.98782 | 18.98768 | 37.97550 |
